# Supplementary material for: Development of Functional Thyroid C Cell-like Cells from Human Pluripotent Cells in 2D and in 3D Scaffolds
Source: MDPI journal article supplement (doi:10.3390/cells10112897), 2021-10-26
Supplement: s1 [file s1]

## Supplementary Materials

**Table S1.** Table of Antibodies.

| Primary Antibodies                                    | Target Type     | Host/Type         | Company                 | Dilution   |
|-------------------------------------------------------|-----------------|-------------------|-------------------------|------------|
| Anti-Procalcitonin (ab166963)                         | C cells         | Sheep polyclonal  | Abcam                   | 1:200      |
| Anti-Calcitonin (A0576)                               | C cells         | Rabbit polyclonal | Dako                    | 1:400–800  |
| Anti-FoxA2 [EPR4466] (ab108422)                       | DE/C cells      | Rabbit monoclonal | Abcam                   | 1:300      |
| Anti-MASH1/Achaete-scute homolog 1 antibody (ab38556) | Neuronal        | Rabbit polyclonal | Abcam                   | 1:500      |
| Anti-PGP9.5 (ab72910)                                 | Neuronal        | Chick Polyclonal  | Abcam                   | 1:500      |
| Anti-Beta III Tubulin raised in chicken               | Neuronal        | Chick Polyclonal  | MERCK PL                | 1:1000     |
| Anti-E-cadherin (610181)                              | Epithelial      | Mouse IgG2a       | BD Biosciences          | 1:200–1000 |
| Recombinant Anti-TTF1 antibody [EP1584Y] (ab76013)    | Thyroid/C cells | Rabbit monoclonal | Abcam                   |            |
| Secondary Antibodies                                  |                 | Host/Isotype      | Company                 | Dilution   |
| Anti-Sheep IgG:Alexa 488 (A-11015)                    |                 | Donkey            | ThermoFisher Sci.       | 1:1000     |
| Anti-Sheep IgG:Alexa 594 (A-11016)                    |                 | Donkey            | ThermoFisher Sci.       | 1:1000     |
| Anti-Rabbit IgG Alexa 488 (A-21206)                   |                 | Donkey            | ThermoFisher Sci.       | 1:1000     |
| Anti-Rabbit IgG Alexa 594 (A-21207)                   |                 | Donkey            | ThermoFisher Sci.       | 1:1000     |
| Anti-Rabbit IgG Alexa 633 (A-21070)                   |                 | Goat              | ThermoFisher Sci.       | 1:1000     |
| Anti-Mouse IgG-specific:Alexa 488 (A-11001)           |                 | Goat              | ThermoFisher Sci.       | 1:1000     |
| Anti-Mouse IgG-specific:Alexa 488 (A-21202)           |                 | Donkey            | ThermoFisher Sci.       | 1:1000     |
| Anti-Mouse IgG+M Alexa 594 (A21203)                   |                 | Donkey            | ThermoFisher Sci.       | 1:1000     |
| Anti-Mouse IgG Alexa 647 (A-31571)                    |                 | Donkey            | ThermoFisher Sci.       | 1:1000     |
| Anti-Chick IgY Alexa 488 (703-545-155)                |                 | Donkey            | Jackson Immuno-research | 1:400–800  |
| Anti-Chick IgY Alexa 568 (A-11041)                    |                 | Goat              | ThermoFisher Sci.       | 1:1000     |
| Anti-Chick IgY Alexa 488 (A-11039)                    |                 | Goat              | ThermoFisher Sci.       | 1:1000     |

**Table S2.** qPCR probes.

| Probes                   | Target Type                   | Product Size | Company           | Accession Number |
|--------------------------|-------------------------------|--------------|-------------------|------------------|
| <i>CDH1</i> (E-cadherin) | Cell-to-cell adhesion protein | 80           | ThermoFisher Sci  | Hs01023895_m1    |
| <i>CDH2</i> (N-cadherin) | Cell-to-cell adhesion protein | 66           | ThermoFisher Sci  | Hs00983056_m1    |
| <i>FOXA1</i>             | Endodermal Marker             | 59           | ThermoFisher Sci  | Hs04187555_m1    |
| <i>FOXA2</i>             | DE Marker                     | 66           | ThermoFisher Sci  | Hs00232764_m1    |
| <i>RET</i>               | Growth factor receptor        | 83           | ThermoFisher Sci  | Hs01120030_m1    |
| <i>GAPDH</i>             | Housekeeper                   | 93           | ThermoFisher Sci. | Hs02758991_g1    |

Table S3. PCR primers for SYBR green qPCR.

| Gene          | Target Type                                   | Sequence 5' to 3'                                        | Product Size |
|---------------|-----------------------------------------------|----------------------------------------------------------|--------------|
| <i>GAPDH</i>  | Housekeeper                                   | F: GTCTCCTCTGACTTCAACAGCG<br>R: ACCACCCTGTTGCTGTAGCCAA   | 131 bp       |
| <i>TG</i>     | Thyroid cell marker                           | F: CCAGTGGCTTCTCTTCCTGACT<br>R: CCTTGGAGGAAGCGGATGGTTT   | 155 bp       |
| <i>TSHR</i>   | Thyroid Cell marker                           | F: GAGTTTCCTTCACCTCACACGG<br>R: CTGCTCTCATTACACATCAAGGAC | 114 bp       |
| <i>RET</i>    | Growth factor receptor                        | F: GAGGAGAGACTACTTGGACCTTG<br>R: GGGGACAGCGGTGCTAGAAT    | 200 bp       |
| <i>EPHA4</i>  | Growth factor receptor                        | F: TTCTGCTATCTTGGCCTCACAG<br>R: TAGACGGAAGTGAAGGAGGT     | 85 bp        |
| <i>CDX2</i>   | Posterior endoderm/Intestinal differentiation | F: ACAGTCGCTACATCACCATCCG<br>R: CCTCTCCTTTGCTCTGCGGTTC   | 107 bp       |
| <i>NKX2.1</i> | DE Marker/Thyroid Transcription Factor        | F: GCAACCTGGGCAACATGAG<br>R: CATGAAGCGGGAGATGGCG         | 122 bp       |
| <i>CER1</i>   | DE marker                                     | F: CAGGACAGTGCCCTTCAGCCA<br>R: ACAGTGAGAGCAGGAGGTATGG    | 142 bp       |
| <i>CALCA</i>  | C-cell Marker                                 | F: GTCATGGGCTTCCAAAAGTTC<br>R: CAGGGCAGACCTGAATGGTG      | 99 bp        |
| <i>PAX8</i>   | Thyroid Follicular Marker                     | F: CGATGCCTCACAACTCCATCA<br>R: GCCAGGTCTACGATGCGCT       | 115 bp       |
| <i>FOXE1</i>  | Thyroid differentiation marker                | F: CTCAAACGGGATGCTTTCTGGT<br>R: GCACATGGAAGGCTGAAACTGA   | 126 bp       |

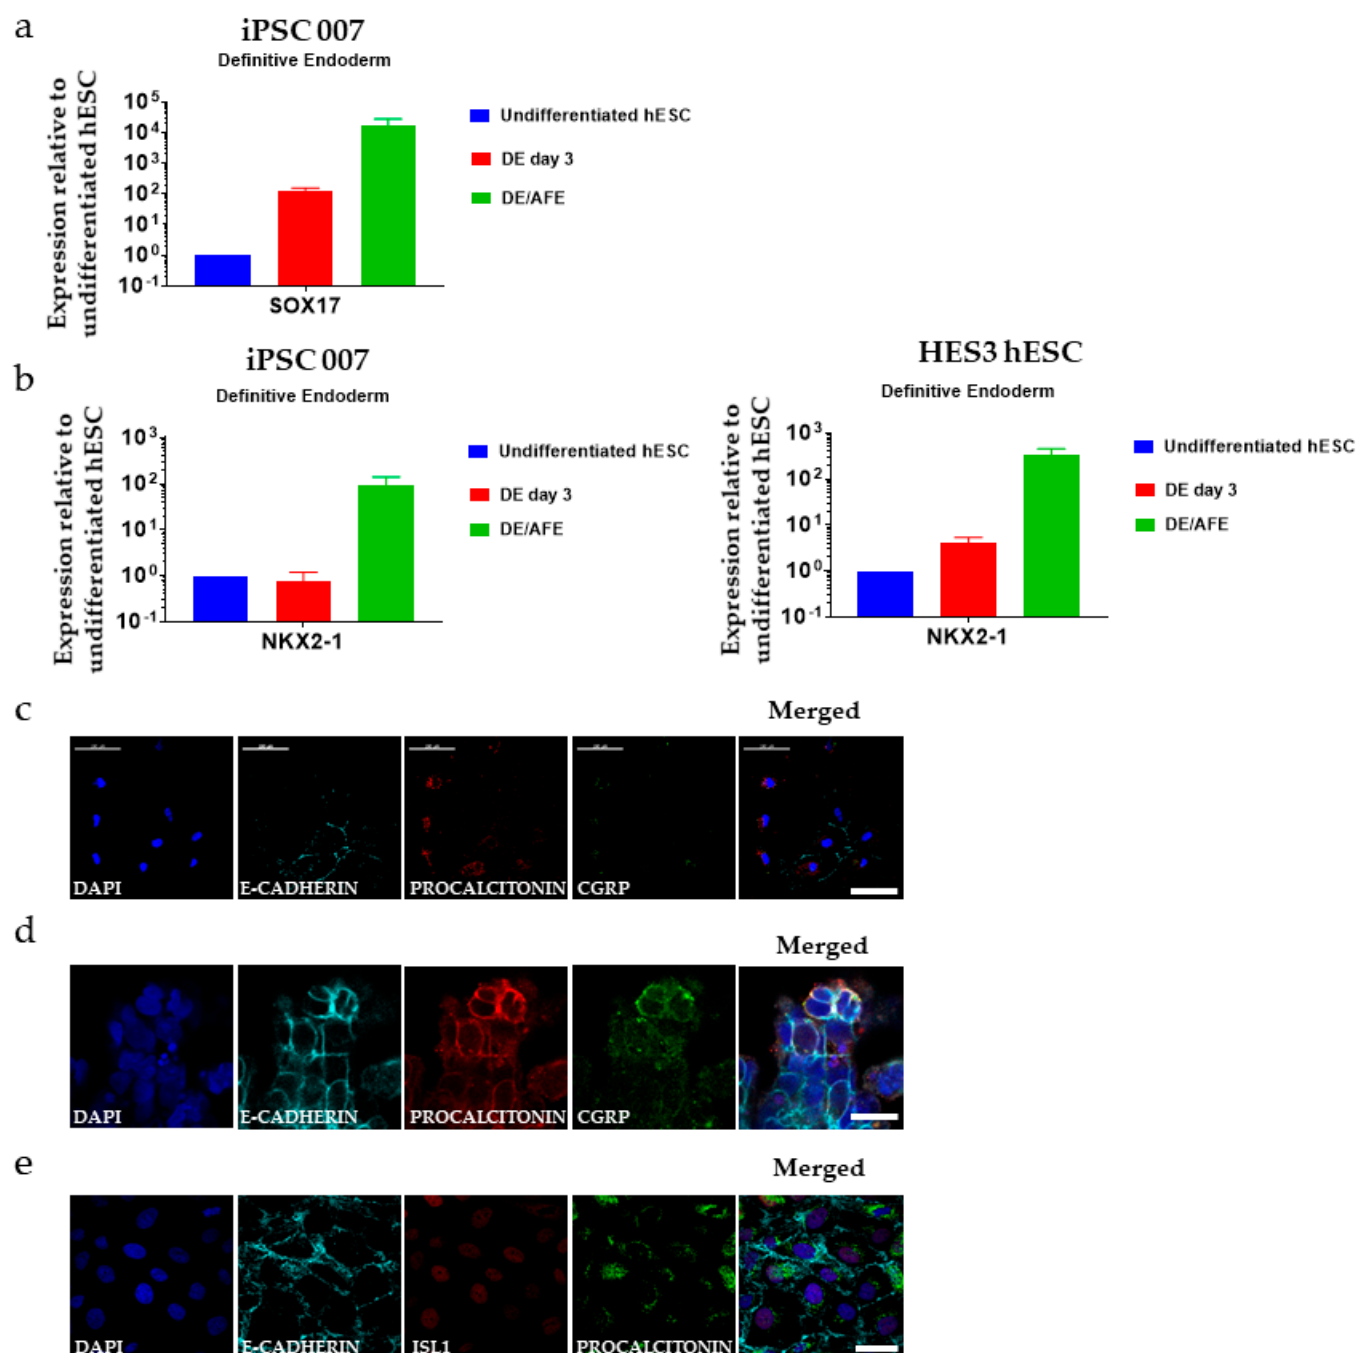

**Figure S1.** (a) QPCR analysis of DE/AFE-like cells normalized to undifferentiated hiPSC (007 Cell line), showing time course upregulation of *SOX17*. No significant difference was recorded. N.D.- Not Detected.  $n = 3$  independent experiments. Error bars represent mean  $\pm$  SEM. (b) QPCR analysis of DE/AFE-like cells normalized to undifferentiated hiPSC (007 Cell line) and hESC (HES3), showing time course upregulation of *NKX2.1*. No significant difference was recorded. N.D.- Not Detected.  $n = 3$  independent experiments. Error bars represent mean  $\pm$  SEM. (c) Immunofluorescence of differentiated thyroid C cell-like cells grown on laminin showing co-expression of C cell lineage markers, E-CADHERIN, CGRP and PROCALCITONIN. Scale bar: 100  $\mu$ m. (d) Immunofluorescence of differentiated thyroid C cell-like cells grown on Matrigel showing co-expression of C cell lineage markers, E-CADHERIN, CGRP and PROCALCITONIN. Scale bar: 20  $\mu$ m. (e) Immunofluorescence of differentiated thyroid C cell-like cells grown on Matrigel showing co-expression of C cell lineage markers, E-CADHERIN, ISL1 and PROCALCITONIN. Scale bar: 20  $\mu$ m.

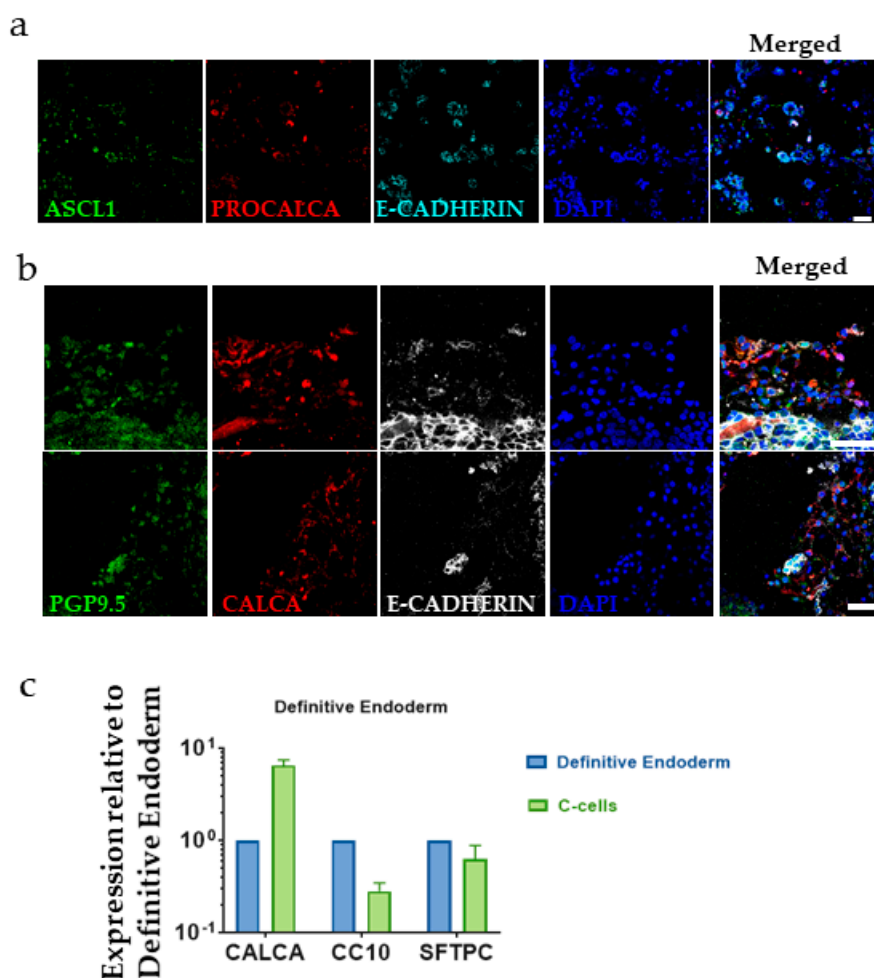

**Figure S2.** (a) Wholemout staining of differentiated thyroid C cell-like cells in 3D Matrigel culTable 1. Scale bar: 100  $\mu$ m. (b) Wholemout staining of differentiated thyroid C cell-like cells in 3D Matrigel co-expressing PGP9.5, E-CADHERIN and CALCITONIN. Scale bar: 100  $\mu$ m. (c) QPCR analysis of thyroid C cell-like cells normalized to differentiated DE/AFE (007 Cell line), showing the downregulation of lung markers- *CC10* and *SFTPC* and upregulation of thyroid C cell-like cells-*CALCA*. No significant difference was recorded. N.D.- Not Detected.  $n = 3$  independent experiments. Error bars represent mean  $\pm$  SEM.

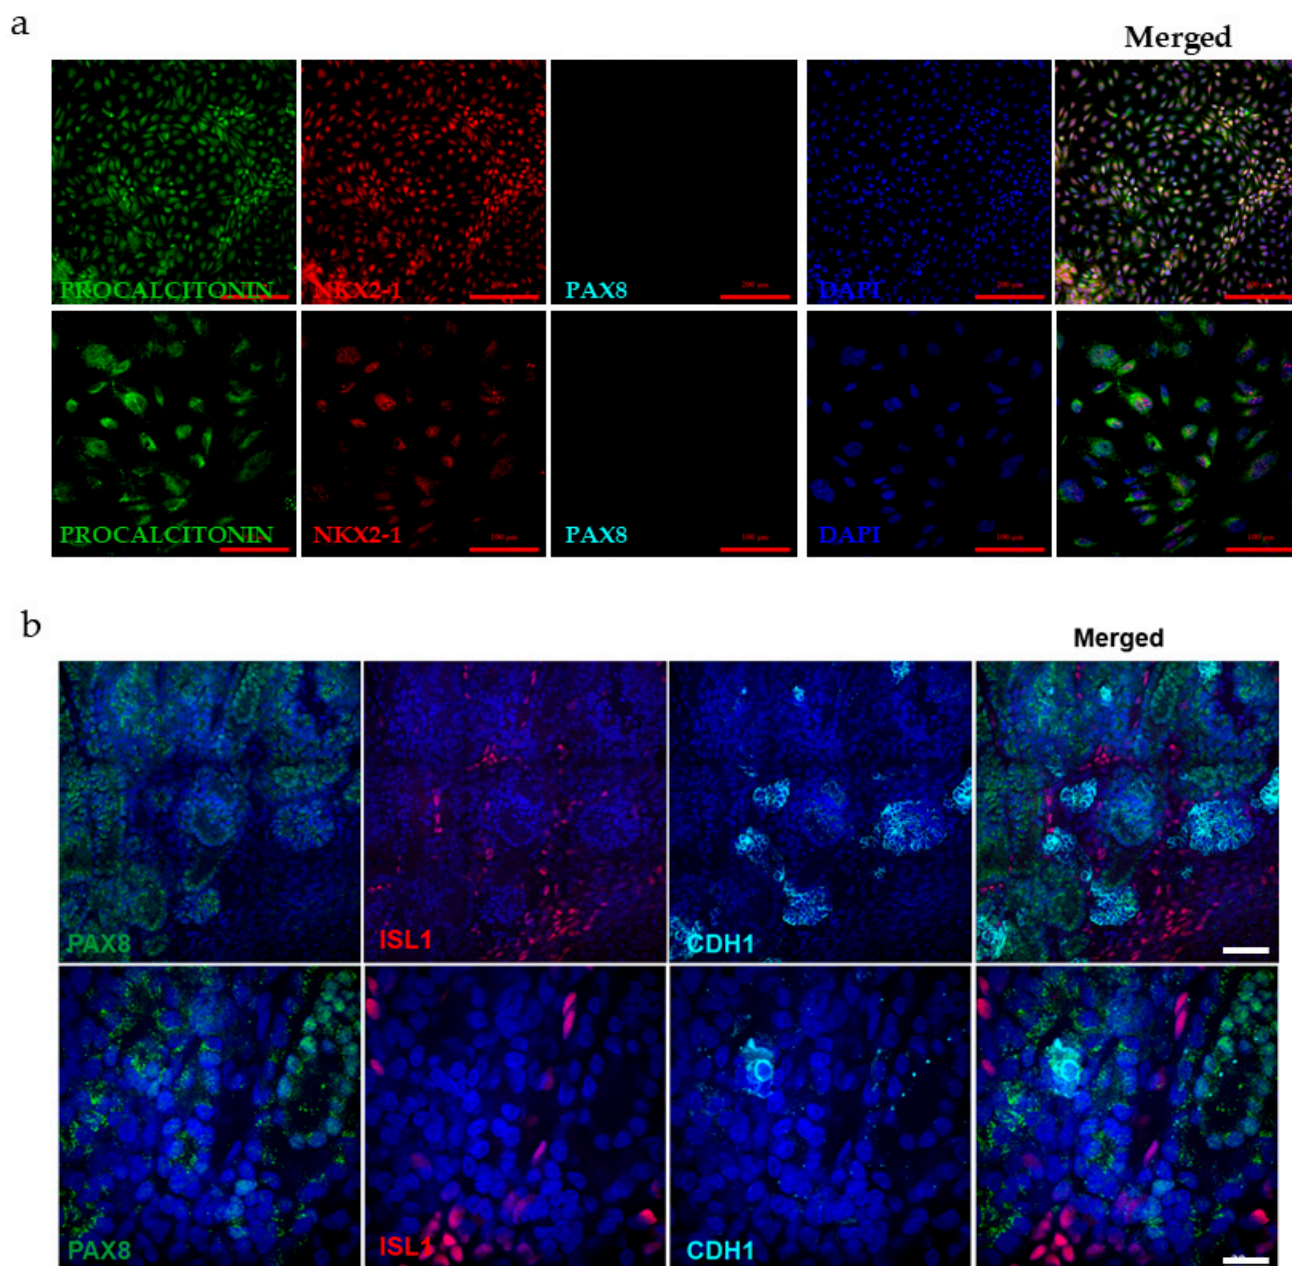

**Figure S3.** (a) Immunofluorescence of differentiated thyroid C cell-like cells grown on Laminin showing co-expression of C cell lineage markers, *NKX2.1* and *PROCALCITONIN* and no expression of thyroid marker, *PAX8*. Scale bar: 200  $\mu$ m (upper) and 100  $\mu$ m (lower). (b) Immunofluorescence of differentiated kidney cells as a positive control showing the specificity of the *PAX8* antibody. Scale bar: 200  $\mu$ m (upper) and 100  $\mu$ m (lower).
